ease with atorvastatin in type 2 diabetes in the Collaborative Atorvastatin Diabetes Study (CARDS): multicentre randomised placebo-controlled trial. *Lancet* 364:685–696, 2004

- McTernan PG, Fisher FM, Valsamakis G, Chetty R, Harte A, McTernan CL, Clark PM, Smith SA, Barnett AH, Kumar S: Resistin and type 2 diabetes: regulation of resistin expression by insulin and rosiglitazone and the effects of recombinant resistin on lipid and glucose metabolism in human differentiated adipocytes. *J Clin Endocrinol Metab* 88:6098–6106, 2003

## Plasma Adiponectin Concentrations Are Independently Predicted by Fat Insulin Sensitivity in Women and by Muscle Insulin Sensitivity in Men

**A**diponectin is an abundant plasma protein, mainly secreted by adipocytes and closely linked to insulin sensitivity (1–4). Plasma adiponectin independently correlates with insulin sensitivity (5). Since women have greater plasma adiponectin levels than men (5–7), we determined sex-specific differences in associations between plasma adiponectin and tissue-specific insulin sensitivity in skeletal muscle, liver, and fat.

Plasma adiponectin concentrations were measured (intra-assay coefficient of variation <4%) in 28 men and 28 women (6 men and 6 women had impaired glucose tolerance according to World Health Organization criteria). Insulin sensitivity in skeletal muscle, liver, and fat was determined by insulin-mediated whole-body glucose disposal (*M* values), suppression of hepatic glucose output evaluated during a hyperinsulinemic-euglycemic clamp, and suppression of free fatty acid (FFA) concentrations during an oral glucose tolerance test (OGTT), respectively.

The BMI and body weights of men and women were similar (mean  $\pm$  SD for BMI  $32.11 \pm 6.89$  vs.  $34.24 \pm 6.44$  kg/m<sup>2</sup>,  $P = 0.24$ ; weight,  $100.77 \pm 23.83$  vs.  $94.19 \pm 19.43$  kg,  $P = 0.26$ ). Men were 9 years older than women ( $52.64 \pm 5.29$  vs.  $43.89 \pm 4.22$  years,  $P < 0.001$ ). The

percentage body fat measured by bioimpedance in women ( $44.56 \pm 5.59\%$ ) was 54.5% greater than that in men ( $28.84 \pm 7.85\%$ ,  $P < 0.001$ ). It is also important to note that *M* values in men ( $6.75 \pm 3.39$  mg  $\cdot$  kg<sup>-1</sup>  $\cdot$  min<sup>-1</sup>) and in women ( $6.81 \pm 2.56$  mg  $\cdot$  kg<sup>-1</sup>  $\cdot$  min<sup>-1</sup>) were similar ( $P = 0.94$ ).

Fasting plasma adiponectin concentrations were negatively correlated with hepatic glucose output in men ( $r = -0.384$ ,  $P = 0.022$ ) and women ( $r = -0.312$ ,  $P = 0.05$ ) and were strongly correlated with *M* values in men ( $r = 0.58$ ,  $P = 0.001$ ), whereas this correlation did not reach statistical significance in women ( $r = 0.229$ ,  $P = 0.242$ ). Fasting plasma adiponectin concentrations were correlated with age, BMI, and percentage body fat in men ( $r = 0.39$ ,  $P = 0.038$ ;  $r = -0.467$ ,  $P = 0.006$ ;  $r = -0.41$ ,  $P = 0.02$ , respectively), but not in women ( $r = 0.027$ ,  $P = 0.89$ ;  $r = -0.13$ ,  $P = 0.26$ ;  $r = -0.06$ ,  $P = 0.77$ , respectively).

Plasma adiponectin concentrations were strongly correlated with percentage FFA suppression at 40 min in both men ( $r = 0.50$ ,  $P = 0.006$ ) and women ( $r = 0.50$ ,  $P = 0.006$ ) during an OGTT. Those correlations were examined at 40 min during the OGTT because percentage FFA suppression at 40 min correlated significantly with *M* values for both men and women.

When the data were stratified by sex, stepwise multivariate linear regression showed that in men, *M* value was a strong independent predictor (adjusted  $R^2 = 0.31$ ,  $P = 0.001$ ) and remained a strong independent predictor of adiponectin concentration (adjusted  $R^2 = 0.39$ ,  $P = 0.002$ ) when age was also included in the model. In women, however, the percentage FFA suppression was the only independent variable predicting plasma adiponectin concentration, and this model explained  $\sim 26.5\%$  ( $R^2 = 0.27$ ,  $P = 0.005$ ) of the variance in plasma adiponectin concentration. When the data sets for men and women were combined, FFA suppression ( $P < 0.001$ ) and sex ( $P = 0.023$ ) were the only independent predictors of plasma adiponectin concentration. The association with sex was independent of body fat and age percentages.

In conclusion, plasma adiponectin is independently predicted by muscle insulin sensitivity in men but by fat insulin sensitivity in women. Of note is the relationship between plasma adiponectin and

FFA suppression, rather than total fat mass, suggesting that fat function is more important than total fat mass in determining plasma adiponectin concentrations, particularly in women. Given that visceral adiposity alters insulin sensitivity, any differences in the relationship between plasma adiponectin and measures of fat function and fat location will require further investigation.

JUNLONG ZHANG, PHD<sup>1</sup>  
 RICHARD I.G. HOLT, PHD, MRCP(UK)<sup>1</sup>  
 SARAH H. WILD, MB, BCHIR, PHD<sup>2</sup>  
 RUTH B. POOLE, BM<sup>1</sup>  
 HELEN HOLT, BM, MRCP(UK)<sup>1</sup>  
 CHRISTOPHER D. BYRNE, PHD, FRCPATH, FRCP<sup>1</sup>

From the <sup>1</sup>Endocrinology & Metabolism Unit, Developmental Origins of Health and Disease Division, School of Medicine, University of Southampton, Southampton General Hospital, Southampton, U.K.; and the <sup>2</sup>Department of Public Health Sciences, University of Edinburgh, Edinburgh, Scotland, U.K.

Address correspondence to Christopher D. Byrne, University of Southampton Level F, Central Block, Mailpoint 113, Southampton General Hospital, Southampton, SO16 6YD, U.K. E-mail: cdtb@soton.ac.uk.

© 2005 by the American Diabetes Association.

### References

- Yamauchi T, Kamon J, Waki H, Terauchi Y, Kubota N, Hara K, Mori Y, Ide T, Murakami K, Tsuboyama Kasaoka N, Ezaki O, Akanuma Y, Gavrilova O, Vinson C, Reitman ML, Kagechika H, Shudo K, Yoda M, Nakano Y, Tobe K, Nagai R, Kimura S, Tomita M, Froguel P, Kadowaki T: The fat-derived hormone adiponectin reverses insulin resistance associated with both lipoatrophy and obesity. *Nat Med* 7:941–946, 2001
- Maeda N, Shimomura I, Kishida K, Nishizawa H, Matsuda M, Nagaretani H, Furuyama N, Kondo H, Takahashi M, Arita Y, Komuro R, Ouchi N, Kihara S, Tochino Y, Okutomi K, Horie M, Takeda S, Aoyama T, Funahashi T, Matsuzawa Y: Diet-induced insulin resistance in mice lacking adiponectin/ACRP30. *Nat Med* 8:731–737, 2002
- Yamauchi T, Kamon J, Minokoshi Y, Ito Y, Waki H, Uchida S, Yamashita S, Noda M, Kita S, Ueki K, Eto K, Akanuma Y, Froguel P, Foufelle F, Ferre P, Carling D, Kimura S, Nagai R, Kahn BB, Kadowaki T: Adiponectin stimulates glucose utilization and fatty-acid oxidation by activating AMP-activated protein kinase. *Nat Med* 8:1288–1295, 2002
- Berg AH, Combs TP, Du X, Brownlee M, Scherer PE: The adipocyte-secreted pro-

- tein Acrp30 enhances hepatic insulin action. *Nat Med* 7:947–953, 2001
5. Tschritter O, Fritsche A, Thamer C, Haap M, Shirravand F, Rahe S, Staiger H, Maerker E, Haring H, Stumvoll M: Plasma adiponectin concentrations predict insulin sensitivity of both glucose and lipid metabolism. *Diabetes* 52:239–243, 2003
  6. Nishizawa H, Shimomura I, Kishida K, Maeda N, Kuriyama H, Nagaretani H, Matsuda M, Kondo H, Furuyama N, Kihara S, Nakamura T, Tochino Y, Funahashi T, Matsuzawa Y: Androgens decrease plasma adiponectin, an insulin-sensitizing adipocyte-derived protein. *Diabetes* 51:2734–2741, 2002
  7. Yamamoto Y, Hirose H, Saito I, Tomita M, Taniyama M, Matsubara K, Okazaki Y, Ishii T, Nishikai K, Saruta T: Correlation of the adipocyte-derived protein adiponectin with insulin resistance index and serum high-density lipoprotein-cholesterol, independent of body mass index, in the Japanese population. *Clin Sci (Lond)* 103:137–142, 2002

## Sexual Dysfunction in Women With the Metabolic Syndrome

Female sexual dysfunction is a largely uninvestigated, yet significant, public health problem, with 43% of women complaining of at least one sexual problem (1). Despite the high prevalence, which appears to surpass that of male sexual dysfunction, only recently has there been some focus on the sexual problems of women. We assessed the prevalence of sexual dysfunction in premenopausal women with the metabolic syndrome as compared with the general female population.

Premenopausal women ( $n = 100$ ) were enrolled if they had three or more of the criteria to meet the diagnosis of the metabolic syndrome, as recommended by the Adult Treatment Panel (2). One hundred women, matched for age, body weight, and premenopausal state, served as the control group. Sexual function was assessed by completing the Female Sexual Function Index (FSFI), which is a validated 19-item self-report measure of six separate domains of female sexual function (3). Four domains are related to the four major categories of sexual dysfunction: desire, arousal, orgasmic, and sexual pain disorder. The fifth domain assesses the quality of vaginal lubrication, and the

sixth domain is related to global sexual and relationship satisfaction. Each domain is scored on a scale of 0 or 1 to 6, with higher scores indicating better function. The full FSFI scale score, which could be 36 at the highest, is obtained by adding the six domain scores.

Women with the metabolic syndrome were matched with women of the control group for age ( $40.2 \pm 4.3$  vs.  $39.1 \pm 3.9$  years), BMI ( $27.8 \pm 2.9$  vs.  $26.9 \pm 2.8$  kg/m<sup>2</sup>), and premenopausal state. Compared with the control group, women with the metabolic syndrome had a reduced mean full FSFI score ( $23.9 \pm 5.4$  vs.  $29.9 \pm 4.8$ ,  $P < 0.001$ ). We considered the functional results to be good when the FSFI score was  $\geq 30$ , intermediate between 23 and 29, and poor when  $< 23$ . The percentages of women falling within these three categories of FSFI score were 77, 21, and 2%, respectively, for control women and 55, 36, and 9%, respectively, for women with the metabolic syndrome ( $P < 0.01$ ).

In our study, we have shown that women with the metabolic syndrome have an increased prevalence of sexual dysfunctions as compared with matched control women. The complexity of the female sexual response and the limited experimental models available have severely hampered progress in this field. Future research in this area will reveal the clinical significance and possible implications of our findings.

KATHERINE ESPOSITO, MD<sup>1</sup>  
 MIRYAM CIOTOLA, MD<sup>2</sup>  
 RAFFAELE MARFELLA, MD, PHD<sup>1</sup>  
 DOMENICO DI TOMMASO, MD<sup>1</sup>  
 LUIGI COBELLIS, MD<sup>2</sup>  
 DARIO GIUGLIANO, MD, PHD<sup>1</sup>

From the <sup>1</sup>Division of Metabolic Diseases, Second University of Naples, Naples, Italy; and the <sup>2</sup>Department of Gynecology, Obstetrics and Reproduction, Second University of Naples, Naples, Italy.

Address correspondence to Katherine Esposito, MD, Division of Metabolic Diseases, Second University of Naples, Piazza L. Miraglia, 80138 Naples, Italy. E-mail: katherine.esposito@unina2.it.

© 2005 by the American Diabetes Association.

•••••

### References

1. Laumann EO, Paik A, Rosen RC: Sexual dysfunction in the United States: prevalence and predictors. *JAMA* 281:537–544, 1999
2. Expert Panel on Detection, Evaluation, and Treatment of High Blood Cholesterol in Adults: Executive summary of the third report of the National Cholesterol Educa-

tion Program (NCEP) Expert Panel on Detection, Evaluation, and Treatment of High Blood Cholesterol in Adults (Adult Treatment Panel III). *JAMA* 285:2486–2497, 2001

3. Rosen RC, Brown C, Heiman J, Leiblum S, Meston C, Shabsigh R, Ferguson D, D'Agostino R Jr: The Female Sexual Function Index (FSFI): a multidimensional self-report instrument for the assessment of female sexual function. *J Sex Mar Ther* 26:191–208, 2000

## Detection of Silent Myocardial Ischemia in Asymptomatic Diabetic Subjects

### The DIAD study

We were impressed by the results of the Detection of Silent Myocardial Ischemia in Asymptomatic Diabetic Subjects (DIAD) study (1), which found that silent myocardial ischemia (SMI) was present in 22% of a large cohort of asymptomatic patients with type 2 diabetes and that the strongest predictor for abnormal cardiac tests was an abnormal Valsalva test. We have also found that autonomic function predicts SMI but that abnormal sympathetic, rather than parasympathetic, tests are predictive.

We selected 12 patients with type 2 diabetes and 12 nondiabetic patients with documented exercise-induced electrocardiogram (ECG) changes (Bruce protocol) and angiographically proven coronary artery disease from the cardiac catheterization database of the Royal Infirmary of Edinburgh, Scotland. The two groups were similar in age ( $59 \pm 2$  vs.  $62 \pm 3$  years), number of diseased coronary arteries ( $2.3 \pm 0.2$  vs.  $2.1 \pm 0.2$ ), and exercise characteristics (exercise time  $326 \pm 24$  vs.  $308 \pm 39$  s, maximum ST depression [ $2.2 \pm 0.2$  vs.  $2.4 \pm 0.3$  mm]). All subjects underwent five well-validated and standard autonomic function tests (2): R-R interval variation with respiration (parasympathetic), R-R interval variation with the Valsalva maneuver (parasympathetic), supine and erect blood pressure (sympathetic), supine and erect heart rate (parasympathetic), and blood pressure response to sustained handgrip (sympathetic). Each test was scored 0 (normal), 1 (borderline), or 2 (abnormal), and all five

tests were then used to compile an autonomic score between 0 and 10.

Although all 24 patients developed ECG evidence of ischemia during treadmill testing, only 50% developed pain (angina pectoralis [AP] group). In the remaining 50%, exertional ischemia was painless (SMI group). Nine of the 12 patients in the SMI group had diabetes, whereas only 3 of the 12 patients in the AP group had diabetes ( $P = 0.013$ ).

The SMI group had a significantly higher total autonomic score ( $4.5 \pm 0.4$  vs.  $0.9 \pm 0.4$ ), which was largely driven by differences in the two measures of sympathetic autonomic function (supine and erect blood pressure  $-5.1 \pm 3.3$  vs.  $6.3$  vs.  $\pm 4.6$  mmHg,  $P < 0.05$ , blood pressure response to sustained hand grip  $6.2 \pm 1.8$  vs.  $14.9 \pm 1.7$  mmHg,  $P < 0.0003$ ). Two nondiabetic subjects with SMI had clearly abnormal autonomic tests.

Although autonomic neuropathy makes SMI more likely in patients with diabetes, it also occurs in those with normal autonomic function (3). In nondiabetic subjects, autonomic neuropathy does not exhibit a clear association with SMI, despite the findings in our small series (4,5).

We used a five-test battery of autonomic function tests and found that tests of sympathetic autonomic function were impaired in the SMI group. The DIAD study only used heart rate changes during deep breathing, the Valsalva maneuver, and standing, which tests predominantly parasympathetic function. Abnormal parasympathetic function has been reported in another cohort of patients with SMI and diabetes (4). We have no explanation for the difference between our finding and those of others.

In summary, we concur that SMI is common in subjects with diabetes and autonomic neuropathy. Both parasympathetic and sympathetic pathways may be involved.

CAROLINE G. BAXTER, MB<sup>1</sup>  
NICOLAS A. BOON, MD<sup>1</sup>  
JAMES D. WALKER, MD<sup>2</sup>

From the <sup>1</sup>Department of Cardiology, Royal Infirmary of Edinburgh, Edinburgh, Scotland; and the <sup>2</sup>Medical Unit, St. John's Hospital, Livingston, Scotland.

Address correspondence to James D. Walker, Medical Unit, St. John's Hospital, Livingston, EH54 6PP, Scotland, U.K. E-mail: james.walker@wlt.scot.nhs.uk.

J.D.W. has been on advisory panels for Novo Nordisk, GlaxoSmithKline, and Takeda and has re-

ceived honoraria from Novo Nordisk, Takeda, Bristol-Myers Squibb, and GlaxoSmithKline.

© 2005 by the American Diabetes Association.

## References

1. Wackers FJ, Young LH, Inzucchi SE, Chyun DA, Davey JA, Barrett EJ, Taillefer R, Wittlin SD, Heller GV, Filipchuk N, Engel S, Ratner RE, Iskandrian AE: Detection of silent myocardial ischemia in asymptomatic diabetic subjects: the DIAD study. *Diabetes Care* 27:1954–1961, 2004
2. Ewing DJ, Martyn CN, Young RJ, Clarke BF: The value of cardiovascular autonomic neuropathy. *BMJ* 285:916–919, 1982
3. Ahluwalia G, Jain P, Chugh SK, Wasir HS, Kaul U: Silent myocardial ischemia in diabetics with normal autonomic function. *Int J Cardiol* 48:147–153, 1995
4. Marchant B, Umachandran V, Stevenson R, Kopelman PG, Timmus AD: Silent myocardial ischaemia: role of subclinical neuropathy in patients with and without diabetes. *J Am Coll Cardiol* 22:1433–1437, 1993
5. Umachandran V, Ranjadayalan K, Ambepityia G, Kopelman PG, Timmus AD: Aging, autonomic function and perception of angina. *Br Heart J* 66:15–18, 1991

## Replacement of Valsartan and Candesartan by Telmisartan in Hypertensive Patients With Type 2 Diabetes

Metabolic and antiatherogenic consequences

Angiotensin II type 1 receptor blockers (ARBs) are widely used in the treatment of hypertension and have been shown to restore impaired intracellular insulin signaling and reduce the incidence of type 2 diabetes (1–3). Telmisartan has a unique property that activates peroxisome proliferator-activated receptor- $\gamma$  (PPAR- $\gamma$ ) (4–6). We studied the effect of this unique property of telmisartan on insulin resistance and circulating levels of adiponectin and highly sensitive C-reactive protein (hs-CRP) in hypertensive patients with type 2 diabetes.

The study comprised 18 participants

with hypertensive type 2 diabetes (9 men and 9 women) aged 36–79 years ( $64 \pm 12$ , mean  $\pm$  SD) and treated with valsartan (80 mg/day,  $n = 11$ ) or candesartan (8 mg/day,  $n = 7$ ) for  $>6$  months. None of the changes in clinical and biochemical findings occurred in the subjects during this period. Then, telmisartan (40 mg/day) was administered instead of the ARBs for 12 weeks. Fifteen subjects were treated with antidiabetic agents (13 sulfonylurea, 2 nateglinide) and 3 with diet therapy alone. There were no changes in diet and other medications. No subject received glitazone and insulin. Statistical analysis was performed using Wilcoxon's matched-pair signed-rank test.

Neither systolic nor diastolic blood pressure were significantly changed. Telmisartan treatment resulted in a significant decrease in fasting insulin level ( $10.7 \pm 3.8$  to  $8.6 \pm 2.7$  mU/L,  $P < 0.01$ ), although decreases in fasting plasma glucose ( $132.5 \pm 55.1$  to  $126.5 \pm 39.3$  mg/dl) and HbA<sub>1c</sub> ( $6.89 \pm 0.89$  to  $6.79 \pm 0.96\%$ ) were not statistically significant. Serum triglyceride levels were significantly reduced from  $133.6 \pm 51.1$  to  $118.7 \pm 48.1$  mg/dl, ( $P < 0.05$ ). Mild improvements in total and HDL cholesterol were also observed after treatment (total cholesterol  $197.2 \pm 28.2$  to  $190.5 \pm 30.5$  mg/dl HDL cholesterol from  $47.6 \pm 11.2$  to  $48.5 \pm 12.1$  mg/dl). Serum adiponectin was significantly increased ( $6.95 \pm 2.91$  to  $7.97 \pm 3.48$   $\mu$ g/ml,  $P < 0.005$ ), and hs-CRP was decreased ( $0.154 \pm 0.155$  to  $0.109 \pm 0.120$  mg/dl,  $P < 0.05$ ). This study also demonstrated the reciprocal association between adiponectin and hs-CRP ( $r = -0.53$ ,  $P < 0.01$ ). Body weight gain and edema never developed.

Adiponectin and hs-CRP are closely related to insulin resistance and development of atherosclerosis (6,7). Our results indicated that telmisartan has beneficial effects on the risk factors for cardiovascular disease, which is a major concern in the treatment of type 2 diabetes. Since all subjects were already treated with ARBs and blood pressure was not changed, the majority of our results were not produced by the further suppression of the rennin-angiotensin system. Our observation in this study is consistent with recent reports that telmisartan, not valsartan, activates PPAR- $\gamma$  (8). Also, our results are in agreement with recent clinical reports that telmisartan improved insulin resistance or glycemic control (9,10).



Our present findings demonstrate that telmisartan has additional effects on insulin sensitivity and antiatherosclerosis, probably via its effects on PPAR- $\gamma$ . These findings offer a new idea for the drug targeted to defend against type 2 diabetes with accompanying metabolic disorders.

YOSHITAKA MIURA, MD, PHD  
NAOKI YAMAMOTO, MD  
SHIN TSUNEKAWA, MD  
SEIKO TAGUCHI, MD  
YOKO EGUCHI, MD, PHD  
NOBUAKI OZAKI, MD, PHD  
YUTAKA OISO, MD, PHD

From the Department of Endocrinology and Diabetology, Nagoya University School of Medicine, Nagoya, Japan.

Address correspondence to Yoshitaka Miura, MD, PhD, Department of Endocrinology and Diabetology, Nagoya University School of Medicine, 65 Tsurumai-cho, Showa-ku, Nagoya, 466-8550, Japan. E-mail: ymiura64@med.nagoya-u.ac.jp.

© 2005 by the American Diabetes Association.

## References

1. Dahlof B, Devereux RB, Kjeldsen SE, Julius S, Beevers G, de Faire U, Fyhrquist F, Ibsen H, Kristiansson K, Lederballe-Pedersen O, Lindholm LH, Nieminen MS, Omvik P, Oparil S, Wedel H, the LIFE Study Group: Cardiovascular morbidity and mortality in the Losartan intervention for endpoint reduction in hypertension study (LIFE): a randomized trial against atenolol. *Lancet* 359:995–1003, 2002
2. Henriksen EJ, Jacob S, Kinnick TR, Teachey MK, Krekler M: Selective angiotensin II receptor antagonism reduces insulin resistance in obese Zucker rats. *Hypertension* 38:884–890, 2001
3. Julius S, Kjeldsen SE, Weber M, Brunner HR, Ekman S, Hansson L, Hua T, Laragh J, McInnes GT, Mitchell L, Plat F, Schork A, Smith B, Zanchetti A: Outcomes in hypertensive patients at high cardiovascular risk treated with regimens based on valsartan or amlodipine: the VALUE randomized trial. *Lancet* 363:2022–2031, 2004
4. Benson SC, Pershadsingh HA, Ho CI, Chittiboyina A, Desai P, Pravenec M, Qi N, Wang J, Avery MA, Kurtz TW: Identification of telmisartan as a unique angiotensin II receptor antagonist with selective PPAR $\gamma$ -modulating activity. *Hypertension* 43:993–1002, 2004
5. Schupp M, Janke J, Clasen R, Unger T, Kintscher U: Angiotensin type 1 receptor blockers induce peroxisome proliferators-activated receptor-gamma activity. *Circulation* 109:2054–2057, 2004
6. Yamauchi T, Kamon J, Waki Y, Terauchi Y, Kubota N, Hara K, Mori Y, Ide T, Mu-

7. rakami K, Tsuboyama-Kasaoka N, Ezaki O, Akanuma Y, Gavrilova O, Vinson C, Reitman ML, Kagechika H, Shudo K, Yoda M, Nakano Y, Tobe K, Nagai R, Kimura S, Tomita M, Froguel P, Kadowaki T: The fat-derived hormone adiponectin reserves insulin resistance associated with both lipotrophy and obesity. *Nat Med* 7:941–946, 2001
8. Ross R: Atherosclerosis: an inflammatory disease. *N Engl J Med* 340:115–126, 1999
9. Fujimoto M, Masuzaki H, Tanaka T, Yasue S, Tomita T, Okazawa K, Fujikura J, Chusho H, Ebihara K, Hayashi T, Hosoda K, Nakao K: An angiotensin II AT1 receptor antagonist, telmisartan augments glucose uptake and GLUT4 protein expression in 3T3-L1 adipocytes. *FEBS Lett* 576:492–497, 2004
10. Pershadsingh HA, Kurtz TW: Insulin-sensitizing effects of telmisartan: implication for treating insulin-resistant hypertension and cardiovascular disease (Letter). *Diabetes Care* 27:1015, 2004
11. Honji S, Nishi Y, Wada Y, Hamamoto Y, Koshiyama H: Possible beneficial effect of telmisartan on glycemic control in diabetic subjects (Letter). *Diabetes Care* 28:498, 2005

## High-Dose Glibenclamide Can Replace Insulin Therapy Despite Transitory Diarrhea in Early-Onset Diabetes Caused by a Novel R201L Kir6.2 Mutation

Recently, mutations in the gene *KCNJ11* encoding the Kir 6.2 subunit of the ATP-sensitive K<sup>+</sup> channel (K<sub>ATP</sub> channel) have been described in patients with permanent neonatal diabetes (1). The K<sub>ATP</sub> channel complex is an aggregate of four subunits of the Kir6.2 inward rectifier channel plus four regulatory units known as the sulfonylurea receptor (SUR1). In pancreatic  $\beta$ -cells, glucose metabolism leads to a rapid rise in intracellular ATP levels, leading to closure of the K<sub>ATP</sub> channel. The resultant cell depolarization is critical for normal insulin secretion. Sulfonylureas are able to close the K<sub>ATP</sub> channel by interacting with SUR1 via an ATP-independent mechanism. As a result, four young patients carrying mutations in the Kir6.2 channel

have been treated with sulfonylureas (2,3) and withdrawn from insulin.

To test whether Kir6.2 mutations are present in Chile and to evaluate the response to sulfonylurea treatment, we tested five Chilean patients with diabetes diagnosed before age 6 months (range 0.25–4.1), requiring insulin treatment since diagnosis. The coding region and intron-exon boundaries of the *KCNJ11* gene were sequenced as previously described (1).

A female patient had a novel heterozygous Kir6.2 mutation, R201L (CGT>CTT). She was underweight at birth (2,120 g at 37 weeks' gestation) and presented with severe ketoacidosis at the age of 4.1 months (pH 6.9, plasma glucose 790 mg/dl). Her postnatal development was normal, without seizures or hypotonia. Her parents, who have normal oral glucose tolerance tests, do not carry the mutation.

At the age of 17 months, the sulfonylurea glibenclamide was slowly introduced. Initially, a once-daily dose of 0.1 mg  $\cdot$  kg<sup>-1</sup>  $\cdot$  day<sup>-1</sup> was given for a week and then changed to a twice-daily dose that increased weekly by 0.1 mg  $\cdot$  kg<sup>-1</sup>  $\cdot$  day<sup>-1</sup>, allowing a simultaneous decrease in insulin doses. After 8 weeks with the glibenclamide dose of 0.8 mg  $\cdot$  kg<sup>-1</sup>  $\cdot$  day<sup>-1</sup>, the insulin was stopped completely. HbA<sub>1c</sub> levels at the beginning and end of the transition period were 7.3 and 5.9%, and mean patient blood glucose readings dropped from a mean 196 to 155 mg/dl. The patient exhibited mild transient diarrhea (three to six episodes per day of soft stools) when the glibenclamide started and every time the dose was increased up to a dose of 0.6 mg  $\cdot$  kg<sup>-1</sup>  $\cdot$  day<sup>-1</sup>. Each episode lasted for 4 or 5 days. After a month off insulin, the patient remained in stable metabolic control with no recurrence of gastrointestinal problems. Optimal glycemic control was achieved by giving the glibenclamide in three equal doses every 8 h.

Insulin concentration did not increase during an intravenous glucose tolerance test (0.3g glucose/kg) performed before glibenclamide was begun. After the 0.8 mg  $\cdot$  kg<sup>-1</sup>  $\cdot$  day<sup>-1</sup> dose was reached and insulin completely withdrawn, the test was repeated and insulin levels increased by 28 pmol/l.

In conclusion, we have described the first reported patient with a spontaneous mutation, R201L, in the Kir6.2 gene. This

novel mutation affects a highly conserved arginine at position R201, which has been shown to be key for ATP binding (1). As seen in the previously reported R201 mutations (R201H and R201C), our patient did not have neurological abnormalities. This child is the fifth reported Kir6.2 patient to be able to discontinue insulin therapy and improve control, although a very high dose (0.8 mg/kg) was needed (equivalent to 60 mg in a 75-kg adult). We report the first case of diarrhea associated with sulfonylurea therapy in a patient with a Kir6.2 mutation, probably related to the action of glibenclamide on inwardly rectifying K<sup>+</sup> channels in the human ileal mucosa (4). This unusual side effect is thought to be dose related and may be relatively common in patients with Kir6.2 mutations who require high doses of sulfonylureas. In our patient, this side effect was transitory, and given the potential benefits of sulfonylurea therapy, we recommend that diarrhea should not immediately lead to the discontinuation of treatment.

ETHEL CODNER, MD<sup>1</sup>  
SARAH FLANAGAN, BSC<sup>2</sup>  
SIAN ELLARD, PHD, MRCPATH<sup>2</sup>  
HERNÁN GARCÍA, MD<sup>3</sup>  
ANDREW T. HATTERSLEY, DM, FRCP<sup>2</sup>

From the <sup>1</sup>Institute of Maternal and Child Research, School of Medicine, University of Chile, Santiago, Chile; the <sup>2</sup>Institute of Biomedical and Clinical Science, Peninsula Medical School, Exeter, U.K.; and the <sup>3</sup>Clinica Santa María, Santiago, Chile.

Address correspondence to Prof. Andrew T. Hattersley, Institute of Biomedical and Clinical Science, Peninsula Medical School, Barrack Road, Exeter EX2 5DW, U.K. E-mail: a.t.hattersley@ex.ac.uk.

© 2005 by the American Diabetes Association.

## References

- Gloyn AL, Pearson ER, Antcliff JF, Proks P, Bruining GJ, Slingerland AS, Howard N, Srinivasan S, Silva JMCL, Molnes J, Edgill EL, Frayling TM, Temple IK, Mackay D, Shield JPH, Sumnik Z, van Rhijn A, Wales JKH, Clark P, Gorman S, Aisenberg J, Ellard S, Njolstad PR, Ashcroft FM, Hattersley AT: Activating mutations in the gene encoding the ATP-sensitive potassium-channel subunit Kir6.2 and permanent neonatal diabetes. *N Engl J Med* 350:1838–1849, 2004
- Zung A, Glaser B, Nimri R, Zadik Z: Glibenclamide treatment in permanent neonatal diabetes mellitus due to an activating mutation in Kir6.2. *J Clin Endocrinol Metab* 89:5504–5507, 2004
- Sagen JV, Raeder H, Hathout E, Shehadeh N, Gudmundsson K, Baevre H, Abuelo D, Phornphutkul C, Molnes J, Bell GI, Gloyn AL, Hattersley AT, Molven A, Sovik O, Njolstad PR: Permanent neonatal diabetes due to mutations in *KCNJ11* encoding Kir6.2: patient characteristics and initial response to sulfonylurea therapy. *Diabetes* 53:2713–2718, 2004
- Burleigh DE: Involvement of inwardly rectifying K<sup>+</sup> channels in secretory responses of human ileal mucosa. *J Pharm Pharmacol* 55:527–531, 2003

## Positive Correlation of Galanin With Glucose in Type 2 Diabetes

Compelling literature (1) has been accumulated regarding the action of galanin as an incretin on insulin secretion. Although galanin inhibits glucose-stimulated insulin release in animals, no such effect has been documented in humans (2). Actually, galanin administration in humans has been shown to suppress the initial postprandial rise in plasma concentration of glucose and insulin (3) with unaltered glucose-stimulated insulin release (2). Nevertheless, basal plasma galanin levels have been shown to diverge with obesity and hormonal status.

We enrolled 21 patients with type 2 diabetes (HbA<sub>1c</sub> 7.8 ± 1.19%): 9 men (aged 54.6 ± 3.87 years, BMI 28.5 ± 1.6 kg/m<sup>2</sup>) and 12 postmenopausal women (follicle-stimulating hormone [FSH] >30 mIU/ml, aged 55.6 ± 3.8 years, BMI 28.4 ± 2.9 kg/m<sup>2</sup>) with a maximum disease duration of 4 years. Twenty-four healthy individuals participated in the study as control subjects: 12 men (aged 55.3 ± 3.1 years, BMI 27.4 ± 2.2 kg/m<sup>2</sup>) and 12 women (FSH >30 mIU/ml, aged 54.17 ± 3.4 years, BMI 28.19 ± 2.2 kg/m<sup>2</sup>) with no history of diabetes, hypertension, liver, or kidney disease. None of the nondiabetic healthy volunteers were taking any medication, and none had a first-degree relative with type 2 diabetes. Written informed consent was obtained from all study participants. Blood samples were collected at rest at 8:00 A.M., after an overnight fast and 24-h alcohol abstinence. Human galanin (hGal) (1) was determined by a radioimmunoassay (Pen-

insula Laboratories, Belmont, CA). Insulin was measured by an enzyme-linked immunosorbent assay (AxSYM; Abbott Laboratories, North Chicago, IL). A two-site sandwich immunoassay, using direct chemiluminescent technology (ADVIA Centaur; Bayer, Leverkusen, Germany) was used for the determination of serum C-peptide.

Interestingly, a statistically significant increase of hGal was found in both women and men with type 2 diabetes compared with control subjects (women 25.6 ± 5.4 vs. 12.2 ± 0.3 pg/ml, *P* < 0.001; men 22.4 ± 2.01 vs. 12.2 ± 1.14 pg/ml, *P* < 0.001).

Additionally, a strong positive correlation of hGal with glucose (*r* = 0.963, *P* < 0.001) and HbA<sub>1c</sub> (*r* = 0.903, *P* < 0.001) was recorded in the women with type 2 diabetes. In men with type 2 diabetes, the above correlation, though statistically significant, was less strong (*P* = 0.05 and 0.04, respectively).

The increment of insulin was shown in both type 2 diabetic men and women, as compared with control subjects (women 20.36 ± 2.89 vs. 4.0 ± 1.30 μIU/ml, *P* = 0.002; men 15 ± 3.1 vs. 4.36 ± 1.97 μIU/ml, *P* < 0.001), whereas C-peptide was increased significantly only in the women with type 2 diabetes (3.1 ± 1.2 ng/ml vs. 1.3 ± 0.4 ng/ml, *P* = 0.001). Of note, insulin showed a significant negative correlation with glucose only in the women.

In conclusion, a strong positive correlation of hGal has been established with glucose in the fasting state. Galanin appears to be related to the presence of type 2 diabetes and not to the patient's obesity and hormonal status.

IOANNIS LEGAKIS, MD<sup>1</sup>  
TIMOS MANTZOURIDIS, PHD<sup>2</sup>  
THEODOROS MOUNTOKALAKIS, MD<sup>3</sup>

From the <sup>1</sup>Department of Endocrinology, Henry Dynan Hospital, Athens, Greece; the <sup>2</sup>Laboratory of Medical Biopathology, Medical School, Evgenidion Hospital, University of Athens, Athens, Greece; and the <sup>3</sup>Third Department of Internal Medicine, Sotiria Hospital, University of Athens, Athens, Greece.

Address correspondence to Dr. Ioannis Legakis, Department of Endocrinology, Henry Dynan Hospital, 27 Navarinou St., Athens 155 62, Greece. E-mail: ilegak@med.uoa.gr.

© 2005 by the American Diabetes Association.

**Acknowledgments**—The authors thank Novartis-Hellas SACI for providing the reagents.



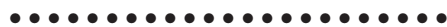

References

1. Vrontakis ME: Galanin: a biologically active peptide (Review). *Curr Drug Targets CNS Neurol Disord* 1:531–541, 2002
2. Holst JJ, Bersani M, Hvidberg A, Knigge U, Christiansen E, Madsbad S, Harling H, Kofod H: On the effects of human galanin in man. *Diabetologia* 36:653–657, 1993
3. Bauer FE, Zintel A, Kenny MJ, Calder D, Ghatei MA, Bloom SR: Inhibitory effect of galanin on postprandial gastrointestinal motility and gut hormone release in humans. *Gastroenterology* 97:260–264, 1989

## INSULOT

A cellular phone–based edutainment learning tool for children with type 1 diabetes

A particular type of education needs to be designed to encourage, motivate, and boost the confidence of type 1 diabetic patients. “Edutainment” has been recognized as an attractive approach to improving educational outcomes for such patients (1). As an edutainment tool, we have developed a cellular phone–based “game” that we call “INSULOT,” a term coined to denote “insulin” and “slot machine.” This tool has been implemented and preliminarily evaluated.

INSULOT is a special, three-window slot machine designed to teach the relationships among plasma glucose level, food (carbohydrate grams), and insulin dosage. INSULOT uses algorithms to simulate postprandial glucose levels, while considering distributions to incorporate clinical uncertainties. The first step is to calculate the “carbohydrate grams” in each food using the concept of total available glucose (2). Then, the insulin-to-carbohydrate ratio is used to simulate the amount of carbohydrates absorbed by a one-unit dose of insulin (3). The final carbohydrate gram level is then calculated by subtracting carbohydrates absorbed by insulin from the intake of carbohydrate grams. Finally, INSULOT demonstrates various images based on the appropriateness of the postprandial plasma glucose level, and the combination of these is used to determine the final score for each time the game is played. INSULOT is a Java 2 Micro Edition application, designed for third-generation cellular phone systems. The application can run as a stand alone and

also be integrated into a World Wide Web environment. All personal settings for algorithms (e.g., body weight, age) used are stored in a web database system and can be updated from the cellular phone.

The game was evaluated by 30 diabetic patients (12–24 years of age) on the basis of entertainment, usability, and its clinical usefulness at a summer camp in Kochi Prefecture, Japan, in 2003. We used a structured survey of 13 questions with a response scale ranking from 1 to 7 (1 = strongly disagree and 7 = strongly agree). Generally, the patients felt the game was interesting (mean  $\pm$  SE 5.57  $\pm$  0.22). Approximately 80% of patients thought that INSULOT could be recommended to other type 1 diabetic patients. INSULOT’s overall usability was highly scored, and most patients were able to play the game without any instruction. More than 80% of patients agreed that the game was useful as a learning tool (5.44  $\pm$  0.29).

Advantages of cellular phone–based games are their interactivity and portability, which could enhance health care delivery and education. Although there are some concerns about the harmful effects of games on adolescents, it is our role as health professionals to develop ways to make the most of such applications, with the goal being health-outcome improvements. One of the most important, but difficult, issues for any edutainment system is how to establish a balance between education and entertainment. A game does not appeal to users if education is overemphasized; however, it cannot be called a learning tool if the game has little appropriate learning content.

In conclusion, we have successfully developed an edutainment tool that combines fun and learning for young people with type 1 diabetes. Our preliminary evaluation demonstrated that the edutainment provided by our INSULOT game was well received as an efficient and enjoyable learning tool. (More information is available at <https://weds.shis.uth.tmc.edu/INSULOT>.)

NORIAKI AOKI, MD, PHD, MS, FJMSIM<sup>1,2</sup>  
 SACHIKO OHTA, MD, PHD<sup>1,2,3</sup>  
 TAISUKE OKADA, MD, PHD<sup>1,4</sup>  
 MARIKO OISHI, MD, PHD, FJMSIM<sup>1,5</sup>  
 TSUGUYA FUKUI, MD, MPH, PHD, FJMSIM<sup>6</sup>

From the <sup>1</sup>Center for Health Service, Outcomes Research and Development-Japan (CHORD-J), Tokyo, Japan; the <sup>2</sup>School of Health Information Sciences, University of Texas Health Science Center at Hous-

ton, Houston, Texas; the <sup>3</sup>Okayama Central Hospital, Okayama, Japan; the <sup>4</sup>Department of Pediatrics, Kochi University School of Medicine, Kochi, Japan; the <sup>5</sup>Oishi Clinic, Kyoto, Japan; and <sup>6</sup>St. Luke’s International Hospital, Tokyo, Japan.

Address correspondence to Noriaki Aoki, MD, PhD, MS, FJMSIM, Assistant Professor, School of Health Information Sciences, University of Texas Health Science Center at Houston, 7000 Fannin, UCT-600, Houston, TX 77030. E-mail: noriaki.aoki@uth.tmc.edu.

© 2005 by the American Diabetes Association.

**Acknowledgments**— This research was supported in part by grants from the Pfizer Health Research Foundation (Tokyo, Japan).

We thank TOSE (Kyoto, Japan) for their support in the development of the application.

Part of this study was presented at the 10th Annual Meeting of the American Telemedicine Association.

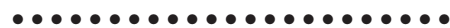

References

1. Aoki N, Ohta S, Masuda H, Naito T, Sawai T, Nishida K, Okada T, Oishi M, Iwasawa Y, Toyomasu K, Hira K, Fukui T: Edutainment tools for initial education of type-1 diabetes mellitus: initial diabetes education with fun. *Medinfo* 2004:855–859, 2004
2. Kulkarni K, Franz MJ: Nutrition therapy for type 1 diabetes. In *American Diabetes Association Guide to Medical Nutrition Therapy for Diabetes*. Franz MJ, Bantle JP, Eds. Alexandria, VA, American Diabetes Association, 2003, p. 26–45
3. Ahern JA: Insulin pump therapy for kids [article online], 2001. Available from <http://www.diabetesselfmanagement.com/article.cfm?aid=472>. Accessed 10 January 2005

## Four-Digit Insulin Dosing Code

A simple solution for insulin dosing error

Medication errors continue to be an issue in health care. The Institute of Medicine’s report, *To Err is Human: Building a Safer Health System*, estimated that medical errors are the eighth leading cause of death in the U.S., with ~7,000 deaths per year occurring from medication errors (1). Insulin is one of the most frequently cited agents and accounts for 13% of all medication errors (2). Human factors (knowledge or performance deficit, miscalculation or preparation of dosage, transcription errors, fatigue, and



H.C.G. has received a research grant from Aventis.  
© 2005 by the American Diabetes Association.

.....  
References

1. Brown JB, Nichols GA, Perry A: The burden of treatment failure in type 2 diabetes. *Diabetes Care* 27:1535–1540, 2004

## Antihypertensive Therapy and Incidence of Type 2 Diabetes in an Elderly Cohort

Response to Padwal et al.

We read the study by Padwal et al. (1) with great interest and feel that it warrants comment. In this retrospective observational cohort study of a large number of elderly patients ( $n = 725,469$ , mean age 72–73 years) but of short duration (mean follow-up period of 9.5–11.6 months), the authors found that incidence of new-onset type 2 diabetes was not different among the four major classes of antihypertensive drugs (ACE inhibitors,  $\beta$ -blockers, calcium channel blockers, and thiazide diuretics). Their findings were in total conflict with other well-conducted prospective studies using ACE inhibitors. For instance, in the CAPPP (Captopril Prevention Project), HOPE (Heart Outcomes Prevention Evaluation), and the more recent PEACE (Prevention of Events with Angiotensin Converting Enzyme Inhibition) studies, it has been consistently shown that patients treated with ACE inhibitors (captopril, ramipril, and trandolapril, respectively) have significantly lower incidence of new-onset type 2 diabetes (2–4). These studies were of a sufficiently long follow-up period (>4 years).

Two factors may account for the surprise findings observed in the Padwal et al. study. First, the study subjects were all elderly patients with a mean age of 72–73 years. Patients who had already developed type 2 diabetes before their enrollment age ( $\geq 66$  years) were excluded. Those who had not developed diabetes were clearly protected by certain intrinsic or environmental factors. Hence, there is a profound element of selection bias,

something that is likely to exist in studies that are retrospective in nature. Second, the short mean follow-up duration of 9.5–11.6 months is hardly sufficient for drug-induced glucose intolerance to occur, even for their large sample size. Given these two critical limiting factors, it is not surprising that they even found  $\beta$ -blockers to be “protective” against the development of diabetes.

NORMAN N. CHAN, MRCP, MD  
PETER C.Y. TONG, FRCP, PHD  
ALICE P.S. KONG, MRCP  
WING-BUN CHAN, MRCP  
JULIANA C.N. CHAN, FRCP, MD

From the Department of Medicine and Therapeutics, Prince of Wales Hospital, The Chinese University of Hong Kong, Shatin, Hong Kong.

Address correspondence to Dr. Peter Tong, Department of Medicine and Therapeutics, The Chinese University of Hong Kong, Prince of Wales Hospital, Shatin, Hong Kong. E-mail: ptong@cuhk.edu.hk.

© 2005 by the American Diabetes Association.

.....  
References

1. Padwal R, Rothwell DM, Mamdani M, Alter DA, Hux JE, Tu K, Laupacis A: Antihypertensive therapy and incidence of type 2 diabetes in an elderly cohort. *Diabetes Care* 27:2458–2463, 2004
2. Hansson L, Lindholm LH, Niskanen L, Lanke J, Hedner T, Niklason A, Luomanmaki K, Dahlof B, de Faire U, Morlin C, Karlberg BE, Wester PO, Björck JE: Effect of angiotensin-converting-enzyme inhibition compared with conventional therapy on cardiovascular morbidity and mortality in hypertension: the Captopril Prevention Project (CAPPP) randomized trial. *Lancet* 353:611–616, 1999
3. Yusuf S, Sleight P, Pogue J, Bosch J, Davies R, Dagenais G: Effects of an angiotensin-converting-enzyme inhibitor, ramipril, on cardiovascular events in high-risk patients: the Heart Outcomes Prevention Evaluation Study Investigators. *N Engl J Med* 342:145–153, 2000
4. Braunwald E, Domanski MJ, Fowler SE, Geller NL, Gersh BJ, Hsia J, Pfeffer MA, Rice MM, Rosenberg YD, Rouleau JL, the PEACE Trial Investigators: Angiotensin-converting-enzyme inhibition in stable coronary artery disease. *N Engl J Med* 351:2058–2068, 2004

## Antihypertensive Therapy and Incidence of Type 2 Diabetes in an Elderly Cohort

Response to Chan et al.

We thank Chan et al. (1) for their interest in our article and agree that selection bias and a relatively short duration of follow-up (primarily due to a high rate of censoring) are potential limitations to our study. These and other potential limitations are described in detail in our discussion section (2). It should be noted that the cohort was comprised of 76,176 individuals in the primary analysis and 100,653 individuals in the secondary analysis (instead of 725,469 individuals, as referenced by Chan et al.).

We have previously systematically reviewed the evidence regarding antihypertensive drug therapy and type 2 diabetes incidence, including the ACE inhibitor drug class (3). Based on current evidence, we cannot confidently conclude that ACE inhibitors prevent diabetes. Chief among our concerns is the fact that no placebo-controlled ACE inhibitor trial has ever evaluated diabetes incidence as a blinded, predefined, primary end point, although such trials are currently underway (2). Chan et al. mention the PEACE (Prevention of Events with Angiotensin Converting Enzyme Inhibition) trial, in which diabetes incidence was assessed in a post hoc analysis (4). How many other ACE inhibitor trials have found nonsignificant results for this end point in post hoc analysis and, hence, have not published the results? Additional potential limitations of studies to date include treatment contamination, failure to control for concomitant drugs affecting glycemic control, the lack of a placebo control group, and a lack of laboratory confirmation of diabetes cases.

However, the critical question is not whether ACE inhibitors lower diabetes incidence, but whether this reduction represents a true preventative effect rather than the simple masking or delaying of latent diabetes by lowering glucose levels below an arbitrary diagnostic threshold. Do ACE inhibitors prevent diabetes-



related complications independent of their blood pressure-lowering effects? Does this putative, preventative effect persist when the drug is stopped? Does therapy stabilize or even reverse  $\beta$ -cell dysfunction and/or insulin resistance? Because the interval between the onset of  $\beta$ -cell dysfunction and overt diabetes averages 10 years (5), the answers to these and other questions will require rigorously designed trials with much longer durations of follow-up. Accordingly, we feel that the role of ACE inhibition in the prevention of type 2 diabetes is far from definitively established.

RAJ S. PADWAL, MD, FRCP<sup>1</sup>  
ANDREAS LAUPACIS, MD, FRCP<sup>2,3,4</sup>

From the <sup>1</sup>Division of General Internal Medicine, University of Alberta, Edmonton, Alberta, Canada; the <sup>2</sup>Institute for Clinical Evaluative Sciences, Toronto, Ontario, Canada; the <sup>3</sup>Faculty of Medicine, Department of Health Policy Management and Evaluation, Toronto, Ontario, Canada; and the <sup>4</sup>Sunnybrook and Women's College Health Sciences Center, Toronto, Ontario, Canada.

Address correspondence to Raj S. Padwal, MD, FRCP, Internal Medicine, University of Alberta, 2E3.22 Walter C. Mackenzie Health Sciences Center, 8440-112th St., Edmonton, Alberta, T6G 2B7, Canada. E-mail: rpadwal@yahoo.com.

© 2005 by the American Diabetes Association.

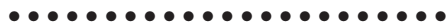

References

1. Chan NN, Tong PCY, Kong APS, Chan W, Chan JCN: Antihypertensive therapy and incidence of type 2 diabetes in an elderly cohort (Letter). *Diabetes Care* 28:762, 2005
2. Padwal R, Rothwell DM, Mamdani M, Alter DA, Hux JE, Rothwell DM, Tu K, Laupacis A: Antihypertensive therapy and incidence of type 2 diabetes in an elderly cohort. *Diabetes Care* 27:2458–2463, 2004
3. Padwal R, Laupacis A: Antihypertensive therapy and incidence of diabetes: a systematic review. *Diabetes Care* 27:247–255, 2004
4. Braunwald E, Domanski MJ, Fowler SE, Geller NL, Gersh BJ, Hsia J, Pfeffer MA, Rice MM, Rosenberg YD, Rouleau JL, the PEACE Trial Investigators: Angiotensin-converting-enzyme inhibition in stable coronary artery disease. *N Engl J Med* 351: 2058–2068, 2004
5. UK Prospective Diabetes Study Group: U.K. Prospective Diabetes Study 16: overview of 6 years' therapy of type II diabetes mellitus. *Diabetes* 44:1249–1258, 1995

**Continuous Subcutaneous Insulin Infusion Versus Multiple Daily Injections: The Impact of Baseline A1c**

Response to Retnakaran et al.

**R**etnakaran et al.'s (1) recent pooled analysis showed improved glycemic control (when using rapid-acting insulin analogs) with continuous subcutaneous insulin infusion (CSII) therapy compared with multiple daily insulin injection (MDII). However, given that CSII users are known to be a well-motivated patient population with far greater adherence to particularly frequent glucose monitoring (often seven or more times per day) and also to have frequent contact with diabetes educators (specifically pump trainers), one wonders if similarly motivated, MDII-treated individuals might have had equivalent improvement in glycemic control. Do Retnakaran et al. have data reflecting objective determination of measures of motivation and adherence (such as frequency of blood-glucose monitoring, frequency of contact with diabetes educators, use or non-use of carbohydrate counting, etc.)? If so, could they comment as to whether this additional information would impact their analysis and conclusions?

IAN BLUMER, MD, FRCP(C)

From the Charles H. Best Diabetes Centre for Children and Youth, Whitby, Ontario, Canada; and the Department of Medicine, Mount Sinai Hospital, Toronto, Ontario, Canada.

Address correspondence to Ian Blumer, MD, 401-95 Bayly St. West, Ajax, ON L1S 7K8, Canada. E-mail: ian@ianblumer.com.

© 2005 by the American Diabetes Association.

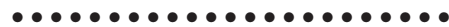

References

1. Retnakaran R, Hochman J, DeVries JH, Hanraire-Broutin H, Heine RJ, Melki V, Zinman B: Continuous subcutaneous insulin infusion versus multiple daily injections: the impact of baseline A1c. *Diabetes Care* 27:2590–2596, 2004

**Continuous Subcutaneous Insulin Infusion Versus Multiple Daily Injections: The Impact of Baseline A1c**

Response to Blumer

**W**e agree with Blumer's (1) contention that patients with type 1 diabetes using continuous subcutaneous insulin infusion (CSII) therapy represent a well-motivated patient population. In this context, he asks whether differences in patient motivation (as reflected in adherence to frequent self-monitoring of blood glucose and regular contact with diabetes educators) may underlie the finding of improved glycemic control with CSII as compared with multiple daily insulin injection (MDII) therapy in our recent pooled analysis of randomized controlled trials comparing CSII and MDII therapy using rapid-acting analogs in adults with type 1 diabetes (2).

Given the clinical trial setting and the crossover nature of the data reported, we feel that differences in patient motivation are likely not the basis for the observed results. Specifically, the data included in the analysis are from randomized clinical trials, in which treatment allocation (i.e., CSII vs. MDII) was randomized and clinical management (i.e., frequency of clinic visits) was standardized. Accordingly, one would not expect systematic bias regarding patient motivation and adherence to be a significant factor. Furthermore, it is particularly important to note that the pooled analysis (Fig. 2 in ref. 2) shows the impact of baseline glycemic control on mean improvement in A1c by treatment modality in those patients for whom crossover data were available. As such, the relationship between greater improvement in A1c with CSII versus MDII in those patients with poorer baseline glycemic control was demonstrated in a patient population in which inpatient treatment effect could be studied (since the crossover patients, by definition, had standardized treatment periods using each of CSII and MDII during the clinical trials in question). Thus, because this

comparison between CSII and MDII was performed in the very same patients, we feel that differences in patient motivation likely did not affect the observed findings.

While patient motivation may not underlie our findings, we nevertheless strongly agree with the contention that patient-driven factors, such as willingness to assume substantial responsibility for their own care, can greatly impact the effectiveness of intensive insulin therapy in clinical practice. As recommended in the American Diabetes Association position statement on insulin pump therapy (3), patient motivation must remain an im-

portant factor to consider when evaluating the suitability of CSII for an individual patient.

**RAVI RETNAKARAN, MD<sup>1,2</sup>**  
**BERNARD ZINMAN, MD<sup>1,2</sup>**

From the Division of Endocrinology, University of Toronto, Toronto, Ontario, Canada; and the Leadership Sinai Centre for Diabetes, Mount Sinai Hospital, Toronto, Ontario, Canada.

Address correspondence to Dr. Bernard Zinman, Leadership Sinai Centre for Diabetes, Mount Sinai Hospital, Lebovic Building, 5th Floor, Room L5-024, 600 University Ave., Toronto, Ontario, Canada, M5G 1X5. E-mail: zinman@mshri.on.ca.

© 2005 by the American Diabetes Association.

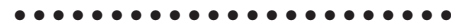

**References**

1. Blumer I: Continuous subcutaneous insulin infusion versus multiple daily injections: the impact of baseline A1c (Letter). *Diabetes Care*:763, 2005
2. Retnakaran R, Hochman J, DeVries JH, Hanaire-Broutin H, Heine RJ, Melki V, Zinman B: Continuous subcutaneous insulin infusion versus multiple daily injections: the impact of baseline A1c. *Diabetes Care* 27:2590–2596, 2004
3. American Diabetes Association: Continuous subcutaneous insulin infusion (Position Statement). *Diabetes Care* 27 (Suppl. 1):S110, 2004
